# Supplementary material
Source: bioRxiv or medRxiv preprint supplement (https://www.biorxiv.org/highwire/filestream/43175/field_highwire_adjunct_files/4/087247-5.pdf)
Supplement: Supplementary file [file 087247-5.pdf]

# BlpC on plate

BlpSRH from strain

|              | ALPHA                                                                               | ECHO                                                                                | FOXTROT                                                                             | DELTA                                                                                | CHARLIE                                                                               | GOLF                                                                                  |
|--------------|-------------------------------------------------------------------------------------|-------------------------------------------------------------------------------------|-------------------------------------------------------------------------------------|--------------------------------------------------------------------------------------|---------------------------------------------------------------------------------------|---------------------------------------------------------------------------------------|
| D39          | 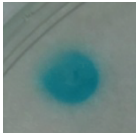   |    |    |    |    |    |
| PMEN-2       |    |    |    |    |    |    |
| Hermans-33   |   |   |   |   |   |   |
| Hermans-1012 |  |  |  |  |  |  |
| PMEN-14      |  |  |  |  |  |  |
| PMEN-18      |  |  |  |  |  |  |
